# Supplementary material for: Unraveling the orientation of an enzyme adsorbed onto a metal–organic framework
Source: Royal Society of Chemistry journal article supplement (doi:10.1039/d4cp01649a), 2024-09-23
Supplement: d4cp01649a1.pdf [file d4cp01649a1.pdf]

## **Supplementary Material**

**for**

### **Unraveling the Orientation of an Enzyme onto Metal–Organic Framework**

Zhiyong Xu, Jian Zhou\*

School of Chemistry and Chemical Engineering, Guangdong Provincial Key Lab for

Green Chemical Product Technology, South China University of Technology,

Guangzhou 510640, P. R. China.

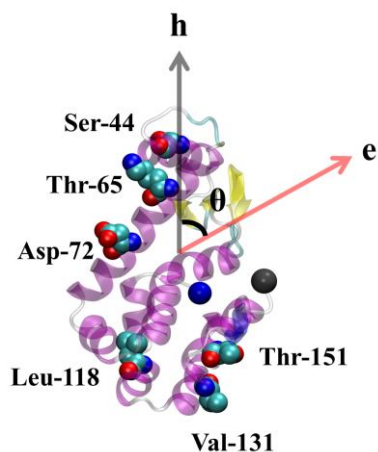

**Fig. S1** The crystal structure of T4L, 6 marker sites consistent with the experimental reports are shown in vdW spheres; N-terminal and C-terminal are displayed in blue and black beads, respectively. The grey vector  $h$  and pink vector  $e$  are the unit vectors in the direction of ZIF-8 surface normal and the electrostatic dipole of the T4L

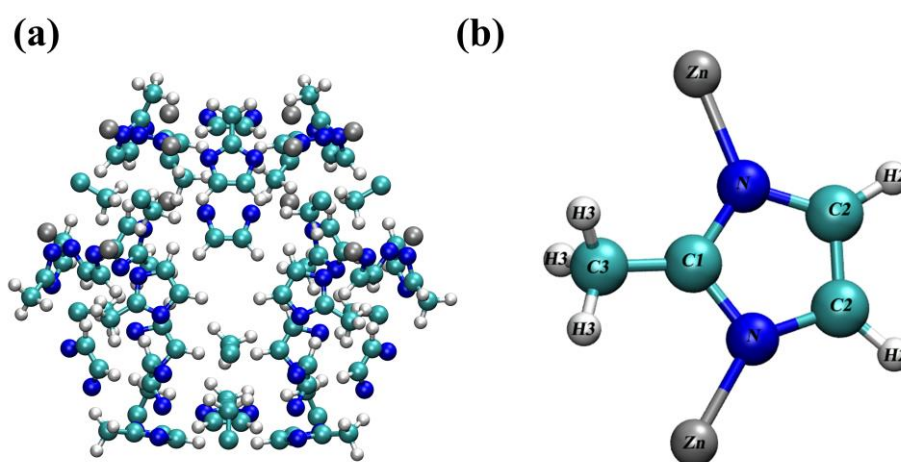

**Fig. S2** The unit cell of ZIF-8 (a) and the cluster models for the 2-methylimidazolate (mIm) linker (b)

**Table S1.** The types and charges of atoms in ZIF-8.

| Atom type | Charge  | $\epsilon$ (kJ/mol) | $\sigma$ (nm) |
|-----------|---------|---------------------|---------------|
| Zn        | 0.7599  | 0.196               | 0.196         |
| N         | -0.4312 | 0.325               | 0.325         |
| C1        | 0.4280  | 0.340               | 0.340         |
| C2        | -0.0571 | 0.340               | 0.340         |
| C3        | -0.4676 | 0.340               | 0.340         |
| H2        | 0.1083  | 0.251               | 0.251         |
| H3        | 0.1399  | 0.265               | 0.265         |

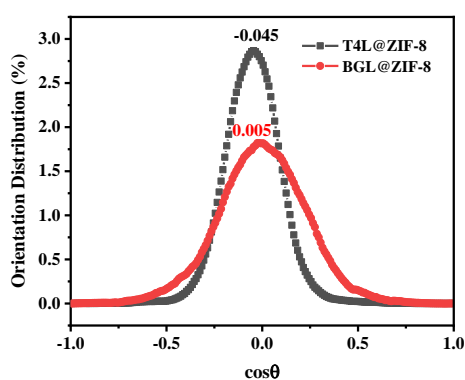

**Fig. S3** Adsorption orientation distributions of T4L and BGL on ZIF-8 by MD simulations

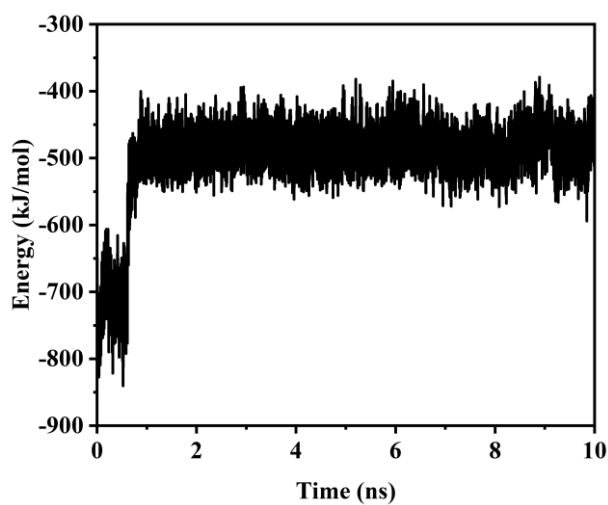

**Fig. S4** Interaction energy between BGL and ZIF-8 in a random umbrella window

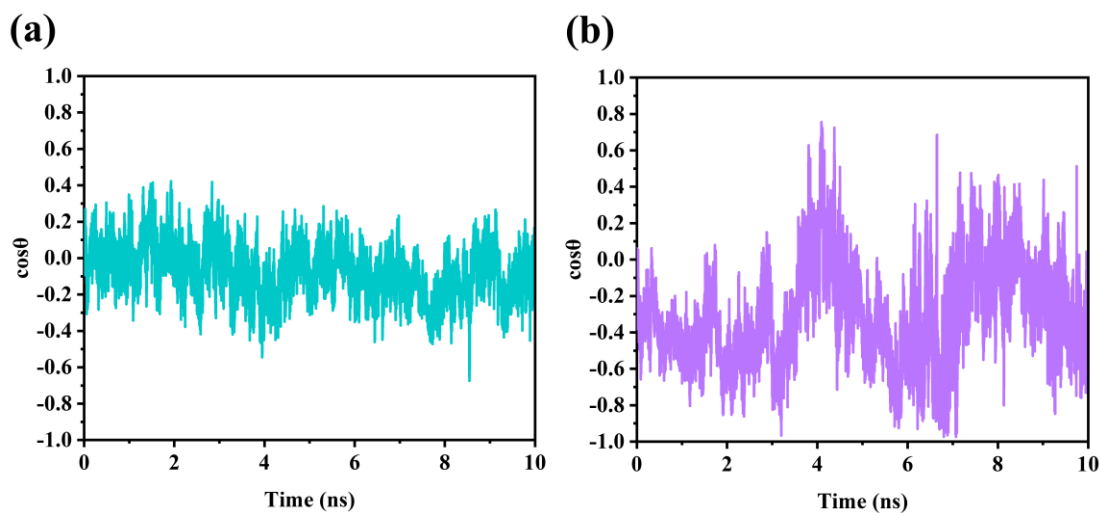

**Fig. S5** Time evolutions of  $\cos\theta$  between BGL and ZIF-8 among two representative umbrella windows, the COM distance between BGL and ZIF-8 is about 35 Å (a) and about 70 Å (b)

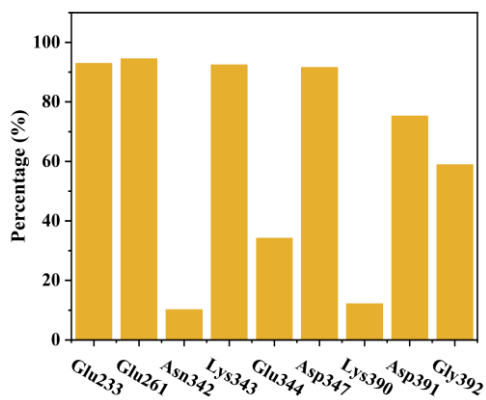

**Fig. S6** Proportion of the trajectory each of the key binding residues is in contact with the ZIF-8 surface

**Table S2.** Adsorption orientations of T4L and BGL obtained by different methods

| Proteins \ Methods | T4L    | BGL   |
|--------------------|--------|-------|
| ProtPOS            | -0.047 | 0.199 |
| MD                 | -0.045 | 0.005 |

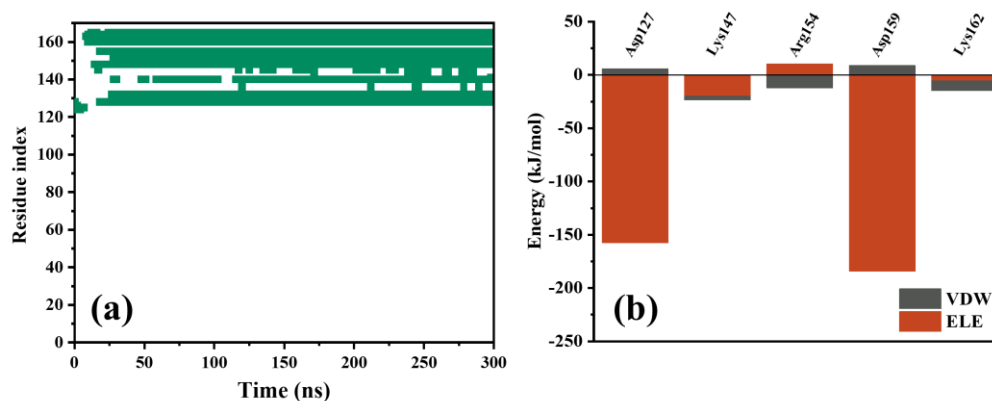**Fig. S7** Residue contact maps of T4L adsorbed on the ZIF-8 surface (a); averaged interaction energy of an individual key residue with the ZIF-8 surface (b)

Residues Asp127, Lys147, Arg154, Asp159 and Lys162 are the key binding sites for T4L on the ZIF-8 surface. After about 30 ns simulation time, they are all stably adsorbed on the ZIF-8 surface. Through negatively charged carboxyl groups, residues Asp127 and Asp159 interact with  $Zn^{2+}$  of ZIF-8 (Figure S5a), contribute strong electrostatic energy around -157.35 and -184.26 kJ/mol, respectively; while the positively charged residues Lys147, Arg154 and Lys162 bind with the ZIF-8 surface through relatively weak vdW interactions, with their interaction energies less than -12 kJ/mol. Hence, electrostatic interaction is the dominant driving force for T4L adsorbed on the ZIF-8.

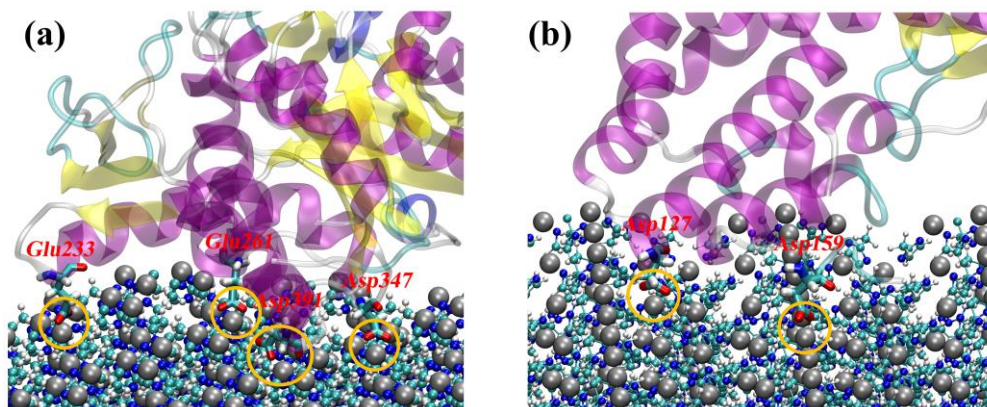

**Fig. S8** The binding between deprotonated carboxyl group of acidic amino acids and the  $Zn^{2+}$  of ZIF-8, BGL@ZIF-8 system (a) and T4L@ZIF-8 system (b)

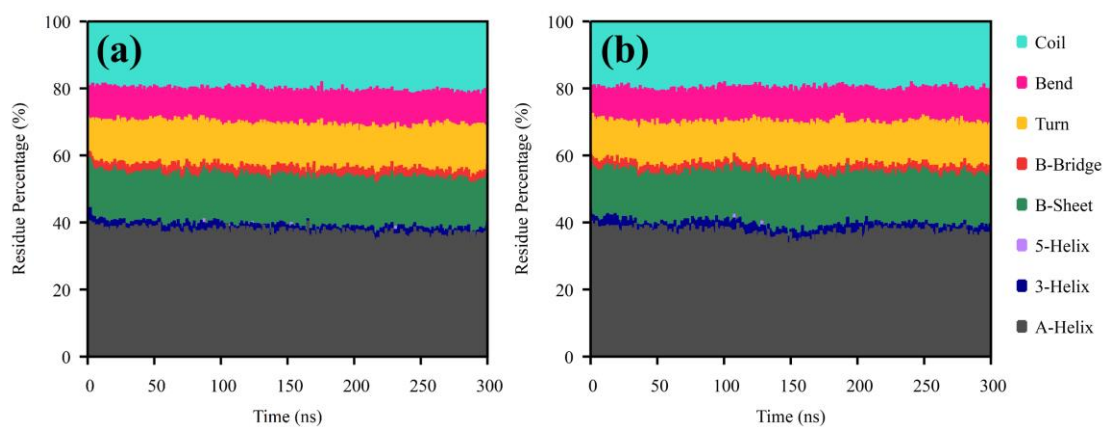

**Fig. S9** Average contents of each secondary structure of the BGL for different systems, bulk solution (a) and BGL@ZIF-8 (b)
